# Supplementary material
Source: Royal Society of Chemistry journal article supplement (doi:10.1039/d6sm00288a)
Supplement: d6sm00288a1.pdf [file d6sm00288a1.pdf]

# Pathways for fast and slow fusion of nanovesicles without membrane rupture: Electronic Supplementary Information

Bartosz Różycki<sup>1</sup>, Rikhia Ghosh<sup>2</sup>, and Reinhard Lipowsky<sup>3</sup>

<sup>1</sup> Institute of Physics, Polish Academy of Sciences,  
Al. Lotników 32/46, 02-668 Warsaw, Poland

<sup>2</sup> Material and Analytical Sciences, Boehringer Ingelheim Inc,  
900 Ridgebury Rd, Ridgefield, CT 06877, USA

<sup>3</sup> Max Planck Institute of Colloids and Interfaces, 14424 Potsdam, Germany

## List of Supplementary Tables

- S1 Outcome of fusion simulations for different values of the lipid number  $N_{ol}$  in the outer leaflet, the lipid number  $N_{il} = 10100 - N_{ol}$  in the inner leaflet, and the dimensionless volume parameter  $\nu = \nu_0$  corresponding to tensionless vesicle bilayers with leaflet tensions  $\Sigma_{ol}$  and  $\Sigma_{in}$  . . . . . S1

Supplementary Table S1: Outcome of fusion simulations for different values of the lipid number  $N_{ol}$  in the outer leaflet, the lipid number  $N_{il} = 10100 - N_{ol}$  in the inner leaflet, and the dimensionless volume parameter  $\nu = \nu_0$  corresponding to tensionless vesicle bilayers with leaflet tensions  $\Sigma_{ol}$  and  $\Sigma_{in}$  in units of  $k_B T/d^2$ . The numerical error of the two leaflet tensions is of the order of  $\pm 0.05 k_B T/d^2$ . For each parameter set,  $n_{traj} = 9$  statistically independent simulations are studied, each with a run time of  $t_{traj}$  in  $\mu s$ . These simulations lead to  $n_{fast}$  fast fusion events and  $n_{slow}$  slow fusion events with  $n_{traj} = n_{fast} + n_{slow}$ . The last column displays the average fusion time  $\langle t_f \rangle$  in  $\mu s$  as obtained by averaging over the fusion times of all  $n_{traj}$  trajectories.

| $N_{ol}$ | $N_{il}$ | $\nu = \nu_0$ | $\Sigma_{ol}$ | $\Sigma_{il}$ | $n_{traj}$ | $t_{traj}$ | $n_{fast}$ | $n_{slow}$ | $\langle t_f \rangle [\mu s]$ |
|----------|----------|---------------|---------------|---------------|------------|------------|------------|------------|-------------------------------|
| 5500     | 4600     | 0.966         | 1.36          | - 1.35        | 9          | 15         | 9          | 0          | 1.4                           |
| 5600     | 4500     | 0.966         | 1.11          | - 1.09        | 9          | 15         | 8          | 1          | 3.1                           |
| 5700     | 4400     | 0.966         | 0.86          | - 0.82        | 9          | 30         | 1          | 8          | 15.8                          |
| 5900     | 4200     | 0.967         | 0.28          | - 0.25        | 9          | > 140      | 0          | 0          | > 140                         |

## List of Supplementary Figures

|    |                                                                                                                                                                    |    |
|----|--------------------------------------------------------------------------------------------------------------------------------------------------------------------|----|
| S1 | Snapshots from a simulation trajectory in which two identical vesicles with $N_{ol} = 5500$ , $N_{il} = 4600$ and $\nu = 0.966$ undergo fast fusion . . . . .      | S3 |
| S2 | Cluster analysis of a simulation trajectory in which two identical vesicles with $N_{ol} = 5500$ , $N_{il} = 4600$ and $\nu = 0.966$ undergo fast fusion . . . . . | S3 |
| S3 | Cumulative probability distribution for the fusion time of two identical vesicles with $N_{ol} = 5500$ , $N_{il} = 4600$ , and $\nu = 0.966$ . . . . .             | S4 |
| S4 | Snapshots from a simulation trajectory of two identical vesicles with $N_{ol} = 5900$ , $N_{il} = 4200$ and $\nu = 0.967$ . . . . .                                | S4 |
| S5 | Cluster analysis of a simulation trajectory of two identical vesicles with $N_{ol} = 5900$ , $N_{il} = 4200$ and $\nu = 0.967$ . . . . .                           | S5 |
| S6 | Snapshots from a simulation trajectory in which two identical vesicles with $N_{ol} = 5500$ , $N_{il} = 4600$ and $\nu = 1$ undergo fast fusion . . . . .          | S5 |
| S7 | Snapshots from a simulation trajectory in which two identical vesicles with $N_{ol} = 5600$ , $N_{il} = 4500$ and $\nu = 1$ undergo fast fusion . . . . .          | S6 |
| S8 | Snapshots from a simulation trajectory in which two identical vesicles with $N_{ol} = 5700$ , $N_{il} = 4400$ and $\nu = 1$ undergo slow fusion . . . . .          | S6 |
| S9 | Snapshots from a simulation trajectory in which two identical vesicles with $N_{ol} = 5700$ , $N_{il} = 4400$ and $\nu = 0.9$ undergo slow fusion . . . . .        | S7 |

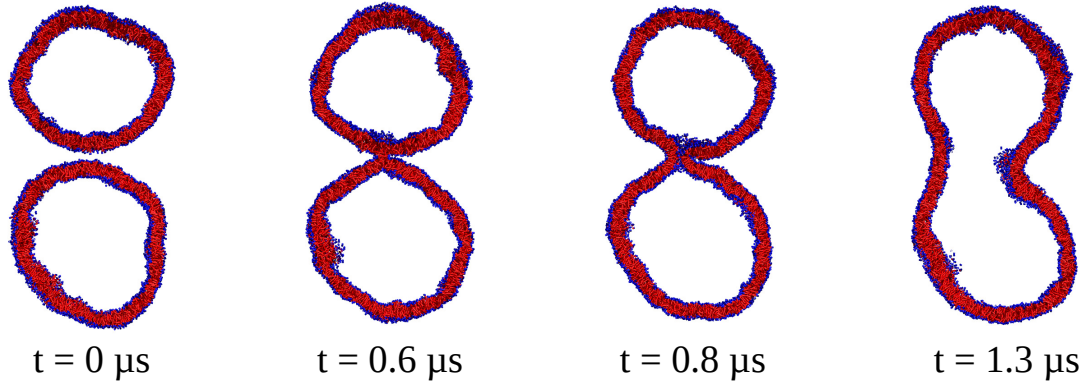

Supplementary Figure S1: Snapshots from a simulation trajectory in which two identical vesicles with  $N_{\text{ol}} = 5500$ ,  $N_{\text{il}} = 4600$  and  $\nu = 0.966$  undergo fast fusion. Lipid tails are shown in red and lipid head-groups in blue. Time  $t = 0 \mu\text{s}$  is defined as the moment at which the two vesicles get in contact. A hemifusion stalk is formed at  $t = 0.6 \mu\text{s}$ . The vesicles fuse at  $t = 0.8 \mu\text{s}$ . The fusion occurs before the vesicles could flatten as a result of their adhesion.

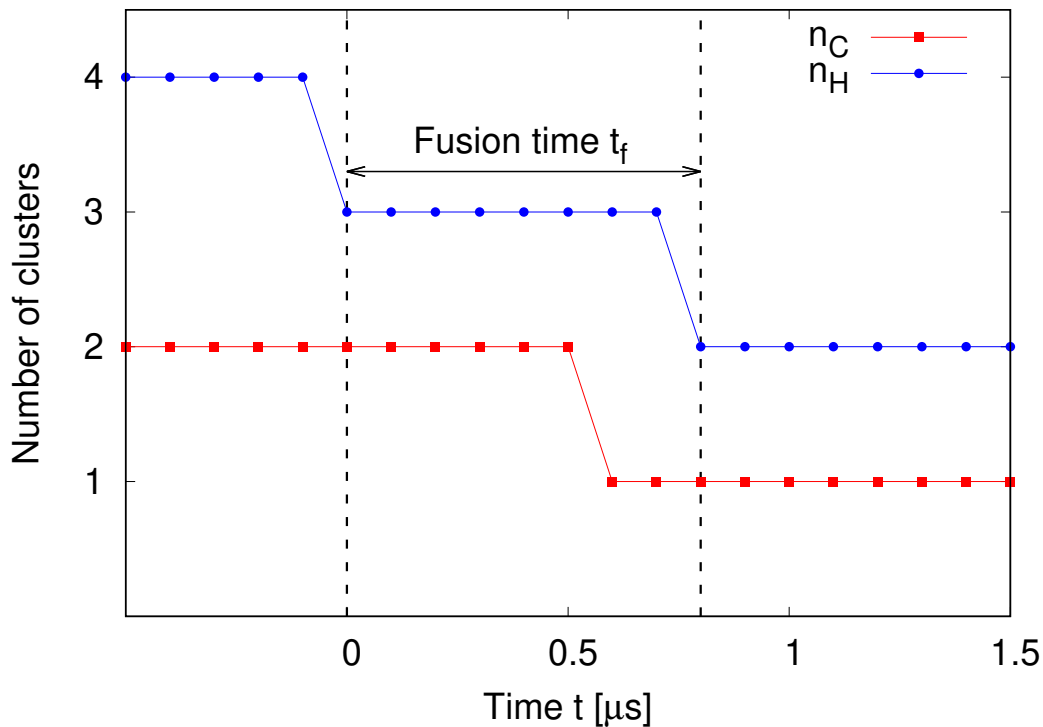

Supplementary Figure S2: Cluster analysis of a simulation trajectory in which two identical vesicles with  $N_{\text{ol}} = 5500$ ,  $N_{\text{il}} = 4600$  and  $\nu = 0.966$  undergo fast fusion. The number  $n_H$  of clusters of lipid headgroups is shown in blue. The number  $n_C$  of clusters of lipid chains is shown in red. At  $t < 0$ ,  $n_H = 4$  and  $n_C = 2$ , because that the two vesicles make no direct contact. At  $t = 0$ , the  $n_H$  value drops from 4 to 3 while  $n_C = 2$ , which reflects the first contact of the the outer leaflets of the two vesicles. At  $t = 0.6 \mu\text{s}$ , the  $n_C$  value drops from 2 to 1 while  $n_H = 3$ , which results from hemifusion stalk formation. At  $t = 0.8 \mu\text{s}$ , the  $n_H$  value drops from 3 to 2 while  $n_C = 1$ , which reflects fusion neck formation. Thus, the fusion time  $t_f = 0.8 \mu\text{s}$  in this case, as indicated by the horizontal arrow. The corresponding snapshots are shown in Fig. S1.

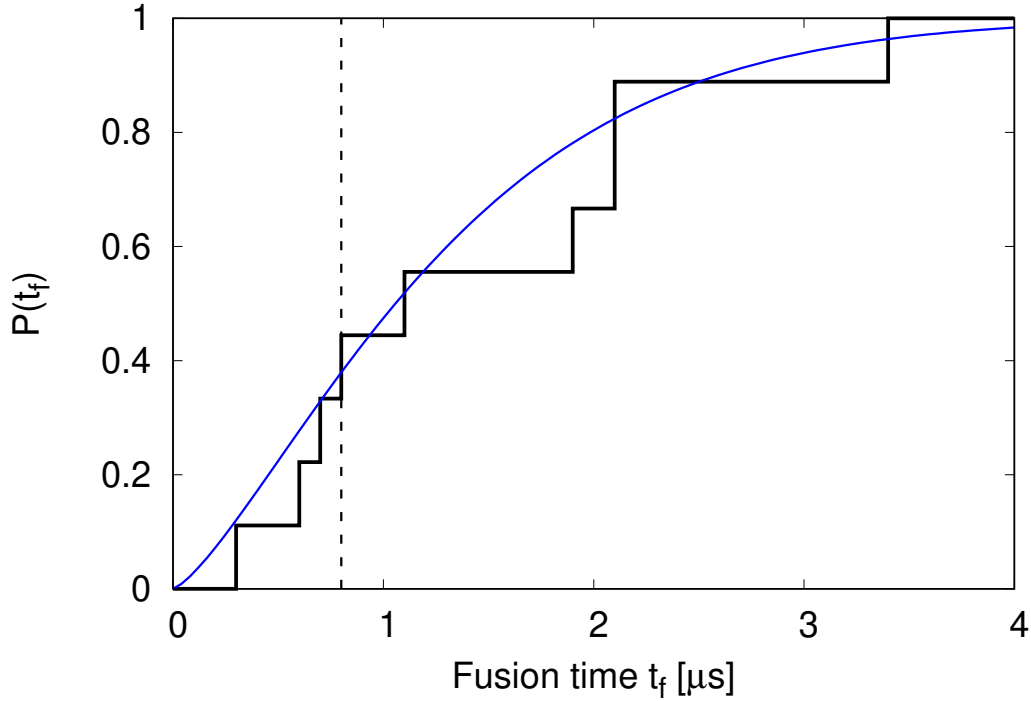

Supplementary Figure S3: Cumulative probability distribution for the fusion time of two identical vesicles with  $N_{ol} = 5500$ ,  $N_{il} = 4600$ , and  $\nu = 0.966$ . The blue line represents the Weibull distribution,  $P(t_f) = 1 - \exp(-(t_f/\tau)^k)$ , where  $\tau$  and  $k$  are fitting parameters. Here,  $\tau = 1.4 \mu\text{s}$  and  $k = 1.3$ . The average fusion time is  $\langle t_f \rangle = 1.4 \mu\text{s}$ . The vertical dashed line indicates  $t_f = 0.8 \mu\text{s}$  and corresponds to the fusion process shown in Figs. S1 and S2.

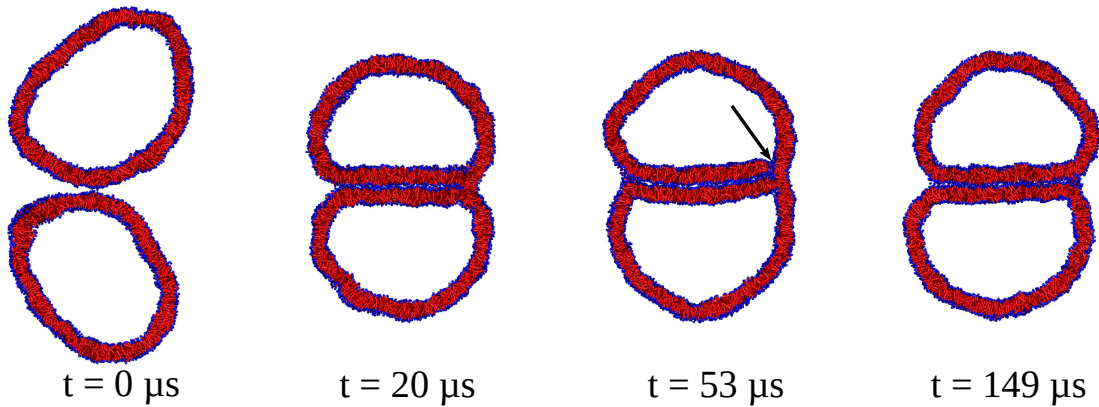

Supplementary Figure S4: Snapshots from a simulation trajectory of two identical vesicles with  $N_{ol} = 5900$ ,  $N_{il} = 4200$  and  $\nu = 0.967$ . Lipid tails are shown in red and lipid head-groups in blue. At  $t = 0 \mu\text{s}$ , the two vesicles get in contact. Then the vesicles form an extended contact area as a result of their adhesion. At  $t = 20 \mu\text{s}$ , a hemifusion stalk forms at a spot on the rim of the adhesion area. At  $t = 53 \mu\text{s}$ , a pore through the upper vesicle bilayer is observed, as indicated by the arrow. No vesicle fusion is observed during the simulation of  $149 \mu\text{s}$ .

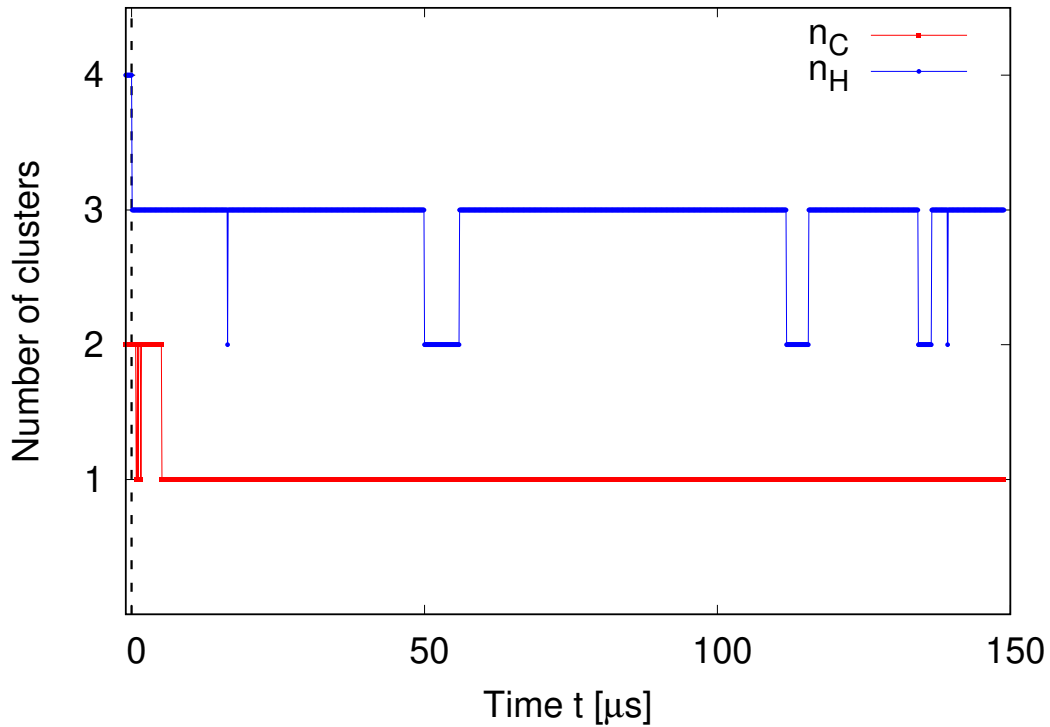

Supplementary Figure S5: Cluster analysis of a simulation trajectory of two identical vesicles with  $N_{ol} = 5900$ ,  $N_{il} = 4200$  and  $\nu = 0.967$ . The number  $n_H$  of clusters of lipid headgroups is shown in blue. The number  $n_C$  of clusters of lipid chains is shown in red. The two vesicles come into contact at  $t = 0 \mu s$ , which results in a change of the headgroup cluster number from  $n_H = 4$  to  $n_H = 3$  while  $n_C = 2$ . The subsequent adhesion state displays some recurrent changes of the chain cluster number between  $n_C = 2$  and  $n_C = 1$  until it is replaced by a hemifused state with  $n_H = 3$  and  $n_C = 1$  at  $t = 4.5 \mu s$ . Furthermore, as shown in Fig. S4 for the time point  $t = 53 \mu s$ , the hemifused state exhibits transient pores, the opening and closure of which change the headgroup cluster number  $n_H$  between  $n_H = 3$  and  $n_H = 2$ . The corresponding snapshots are shown in Fig. S4.

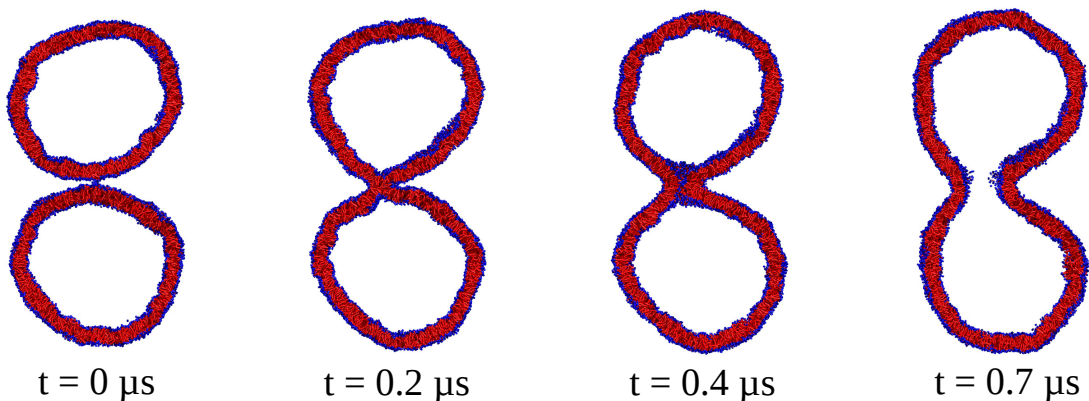

Supplementary Figure S6: Snapshots from a simulation trajectory in which two identical vesicles with  $N_{ol} = 5500$ ,  $N_{il} = 4600$  and  $\nu = 1$  undergo fast fusion. Lipid tails are shown in red and lipid head-groups in blue. Time  $t = 0 \mu s$  is defined as the moment at which the two vesicles get in contact. At  $t = 0.2 \mu s$  a hemifusion stalk is formed. At  $t = 0.4 \mu s$  a pore through both of the vesicle bilayers can be observed. The vesicles fuse at  $t = 0.7 \mu s$ . The fusion occurs before the vesicles could flatten as a result of their adhesion. The fusion time  $t_f = 0.7 \mu s$  in this trajectory.

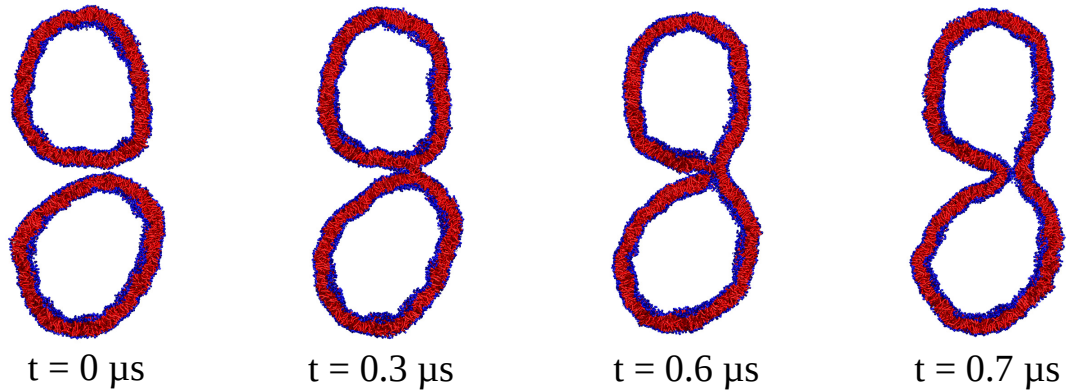

Supplementary Figure S7: Snapshots from a simulation trajectory in which two identical vesicles with  $N_{\text{ol}} = 5600$ ,  $N_{\text{il}} = 4500$  and  $\nu = 1$  undergo fast fusion. Lipid tails are shown in red and lipid head-groups in blue. Time  $t = 0$  is defined as the moment at which the two vesicles get in contact. At  $t = 0.3 \mu\text{s}$  a hemifusion stalk can be observed. At  $t = 0.6 \mu\text{s}$  a pore through the vesicle bilayers can be observed. The vesicles fuse at  $t = 0.7 \mu\text{s}$ . The fusion occurs before the vesicles could flatten as a result of their adhesion. The fusion time  $t_f = 0.7 \mu\text{s}$  in this trajectory.

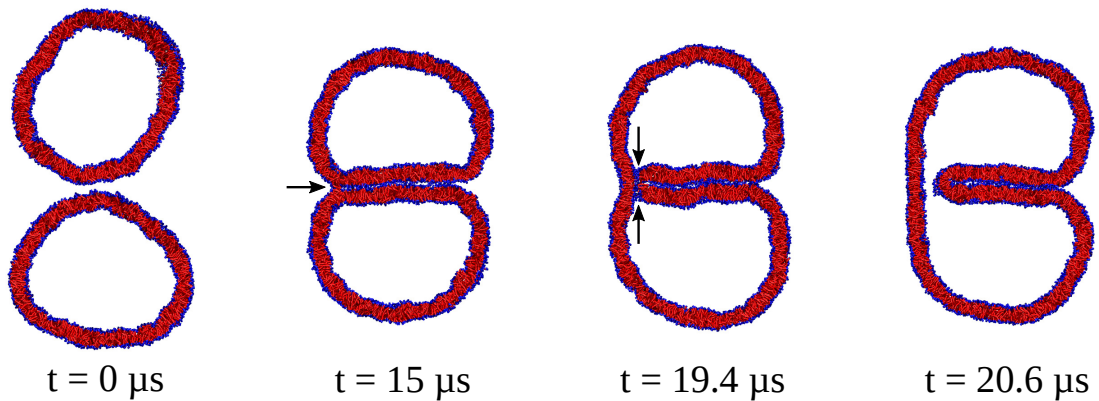

Supplementary Figure S8: Snapshots from a simulation trajectory in which two identical vesicles with  $N_{\text{ol}} = 5700$ ,  $N_{\text{il}} = 4400$  and  $\nu = 1$  undergo slow fusion. Lipid tails are shown in red and lipid head-groups in blue. Time  $t = 0$  is defined as the moment at which the two vesicles get in contact. A hemifusion stalk can be observed in the snapshot at  $t = 15 \mu\text{s}$  in a spot on the rim of the adhesion area, as indicated by the horizontal arrow. At  $t = 19.4 \mu\text{s}$ , a pore through both of the vesicle bilayers can be seen, as indicated by the vertical arrows. The fusion occurs at  $t = t_f = 20.6 \mu\text{s}$ , i.e. long after the vesicles formed an extended contact area as a result of their adhesion.

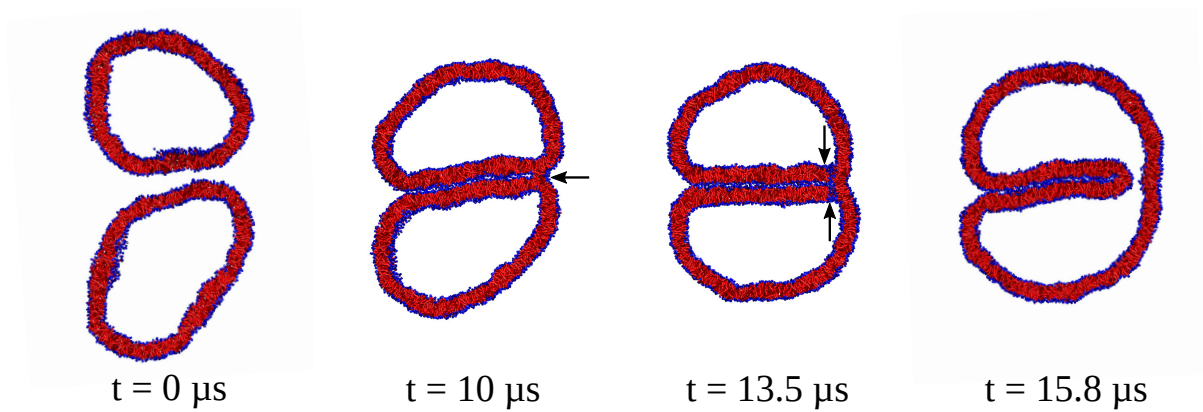

Supplementary Figure S9: Snapshots from a simulation trajectory in which two identical vesicles with  $N_{\text{ol}} = 5700$ ,  $N_{\text{il}} = 4400$  and  $\nu = 0.9$  undergo slow fusion. Lipid tails are shown in red and lipid head-groups in blue. Time  $t = 0$  is defined as the moment at which the two vesicles get in contact. A hemifusion stalk can be observed in the snapshot at  $t = 10 \mu\text{s}$ . The hemifusion stalk is located in a spot on the rim of the adhesion area, as indicated by the horizontal arrow. At  $t = 13.5 \mu\text{s}$ , a pore through both of the vesicle bilayers is formed. This pore is indicated by the vertical arrows. The fusion occurs at  $t = t_f = 15.6 \mu\text{s}$ , i.e. long after the vesicles formed an extended contact area as a result of their adhesion.
